# Supplementary material for: Effects of Process-Genre Approach on Students’ Writing Strategy Use in Paragraphs: Second-Year Wachemo University Students
Source: Hindawi journal article supplement (doi:10.1155/2024/5527768), 2024-03-26
Supplement: f1 [file 5527768.f1.docx]

**Supplementary Material: Questionnaires for Students’ Paragraph Writing Strategy Use**

Jimma University School of postgraduate Studies

College of Social Science and Humanities Department of English Language and Literature

Student‘s Questionnaire

The purpose of this questionnaire is to investigate how often second-year undergraduate students in the College of Business and Economics departments use paragraph writing strategies based on the process-genre approach. Put a tick mark (√) under the alternative given in front of each statement to the appropriate number 1, 2, 3, 4, or 5. The answers will contribute to the dissertation title " **effects of process-genre approach on students’ writing strategy use in paragraphs: second-year Wachemo University students”.** In other words, these ranges demonstrate how you carry out your writing strategies every day.

1. means **never true** that the statement is very rarely true of you.
2. means **rarely true** that the statement is true of you less than half of the time.
3. means **sometimes true** that the statement is true of you about half of the time.
4. means **usually true** that the statement is true of you more than half the time.
5. means **always true** that the statement is true of you almost always.

Answer in terms of how well the statement describes you. Do not answer what you would like to do or what other people think you should do. Remember that there are no rights or wrong answers since each writer writes differently. Write the answers (1, 2, 3, 4, or 5) on a separate answer sheet. If you have any questions, ask the researcher.

Thank you for your cooperation.

**Instruction I:** Before you respond to the items given below, complete the following information:

1. Sex: 2.Department: 3.ID No.:

**Instruction II:** In the left column of the table below, please, read each of the columns showing how students use paragraph writing strategies and put a tick (√) in the box if it is appropriate to select a rating.

| **No.** | **Items** | | **Frequency** | | | | |
| --- | --- | --- | --- | --- | --- | --- | --- |
| **Never true**  **(1)** | **Rarely true**  **(2)** | **Sometimes true**  **(3)** | **Usually true**  **(4)** | **Always true**  **(5)** |
| **Part 1: Cognitive Writing Strategies** | | **Remembering** |  |  |  |  |  |
| 1 | I choose a type of paragraph topic in order to develop the writing activities. | |  |  |  |  |  |
| 2 | I use my experiences and background knowledge to produce new ideas for paragraph writing. | |  |  |  |  |  |
| **Connecting** | | | | | | | |
| 3 | I try to make an association between what I already know and new things that I learn. | |  |  |  |  |  |
| 4 | I make sure the clarity of contents in paragraph writing that expresses the ideas clearer. | |  |  |  |  |  |
| 5 | I consider the task instructions carefully before a paragraph writing. | |  |  |  |  |  |
| **Generating Ideas** | | | | | | | |
| 6 | If I don’t know a word in English to write a paragraph,  I try to use an Amharic word and find the appropriate new words. | |  |  |  |  |  |
| 7 | I usually discuss the topic with a friend or classmate to generate content for paragraph  writing. | |  |  |  |  |  |
| 8 | I simplify my thoughts and ideas if I do not know how to express them in paragraph writing. | |  |  |  |  |  |
| 9 | I note down words and short notes related to the  topic in English or Amharic. | |  |  |  |  |  |
| **Modeling and reinforcing** | | | | | | | |
| 10 | I discuss the social functions of a model paragraph (social situation). | |  |  |  |  |  |
| 11 | When I write a paragraph, I try to consider for my audience (Writer-readers and their relationship). | |  |  |  |  |  |
| 12 | When I write a paragraph, I try to consider the communicative purposes for a model paragraph, i.e., getting a high score on the test, conveying  ideas to others, or writing emails to others). | |  |  |  |  |  |
| 13 | I familiarize myself with the generic structure of a paragraph (topic sentence, supporting sentences, and  concluding sentence) before I write it. | |  |  |  |  |  |
| 14 | I describe the language features of a paragraph (sentence structure, vocabulary, style, formal, etc)  before I write it. | |  |  |  |  |  |
| 15 | I try to make some comparisons with other model paragraphs to reinforce what I have learned. | |  |  |  |  |  |

| **Part 2: Meta-Cognitive Writing Strategies: Planning** | | | | | | |
| --- | --- | --- | --- | --- | --- | --- |
| 16 | I plan what linguistic features I am going to use in my paragraph with reference to the writing topic. |  |  |  |  |  |
| 17 | I plan how I am going to structure different parts of the paragraph. |  |  |  |  |  |
| 18 | I prepare a list of useful keywords or vocabulary items for paragraph writing. |  |  |  |  |  |
| 19 | I brainstorm many ideas fast before I start writing a paragraph. |  |  |  |  |  |
| 20 | I make plans in my native language before paragraph writing. |  |  |  |  |  |
| **Monitoring** | | | | | | |
| 21 | I try to focus my attention on choosing appropriate words and phrases. |  |  |  |  |  |
| 22 | I attempt to think about how to connect different  parts of my paragraph (e.g. using transitional words). |  |  |  |  |  |
| 23 | I try to think about whether I am using the correct  grammar (e.g. tenses, prepositions, etc.). |  |  |  |  |  |
| 24 | I strive to think about whether I am spelling some words correctly |  |  |  |  |  |
| 25 | I seek to think about whether I am using appropriate punctuation as well as the letter case. |  |  |  |  |  |
| **Evaluating** | | | | | | |
| 26 | During the editing stage, I make sure that the grammar of my paragraph is correct. |  |  |  |  |  |
| 27 | During the editing stage, I check the spelling in my writing (with a spell checker or dictionary). |  |  |  |  |  |
| 28 | During the editing stage, I corroborate if my  paragraph has unity (i.e. all the sentences are about the topic). |  |  |  |  |  |
| 29 | During the editing stage, I ensure if my paragraph  has coherence (i.e. my paragraph flows smoothly from beginning to end). |  |  |  |  |  |
| 30 | Revising and editing my written work helps me improve my paragraph writing. |  |  |  |  |  |
| **Part 3: Compensation Writing Strategies** | | | | | | |
| 31 | I use synonyms and write new sentences when I can’t find the word I mean. |  |  |  |  |  |
| 32 | I try to think of a sentence in my native language first and then translate it into English. |  |  |  |  |  |
| 33 | I endeavor to think of another similar word if I can’t  think of the word in English that I need for writing a paragraph. |  |  |  |  |  |

| 34 | I look up the words in the dictionary if I’m not sure of their meaning to the written paragraph. |  |  |  |  |  |
| --- | --- | --- | --- | --- | --- | --- |
| 35 | I make guesses when I can’t find the exact word that I need. |  |  |  |  |  |
| **Part 4: Social Writing Strategies** | | | | | | |
| 36 | I discuss what I write with my peers to get feedback on how to improve my paragraph writing. |  |  |  |  |  |
| 37 | I confer when I write a paragraph with my  teacher to get more feedback on how to improve the paragraph writing (correction of my paragraph writing). |  |  |  |  |  |
| 38 | During editing the stage. I make sure that I have  covered the content fully before I submit it to my  teacher. |  |  |  |  |  |
| 39 | I check my mistakes after I get the paperback  from my teacher with feedback and try to learn from writing a paragraph. |  |  |  |  |  |
| 40 | After working hard on my paragraph writing, I  attempt to show my final paragraph writing to others (teacher, friends. etc.) |  |  |  |  |  |
| **Part 5: Affective writing strategies** | | | | | | |
| 41 | I encourage myself to find a better solution to a linguistic problem in paragraph writing. |  |  |  |  |  |
| 42 | I reward myself when I have finished writing a paragraph. |  |  |  |  |  |
| 43 | I use a diary to write everything about how I feel about my paragraph. |  |  |  |  |  |
| 44 | When I write a paragraph that is not as good as  what I need, I try to overcome feelings of frustration, sadness, etc. |  |  |  |  |  |

**Adopted and modified from Petric‘s & Czárl‘s (as cited in Habtamu, 2018) and the researcher**
